# Supplementary material
Source: HighWire-hosted journal article supplement (https://cmaj.ca/highwire/filestream/59311/field_highwire_adjunct_files/3/150067-res-4-at.pdf)
Supplement: 150067-res-4-at.pdf [file 150067-res-4-at.pdf]

**Appendix 4 (as supplied by the authors):** Distribution of second antibiotic prescriptions

| Initial Antibiotic           | Number of Patients with a Second Prescription | Second Antibiotic Prescription |               |              |              |              |
|------------------------------|-----------------------------------------------|--------------------------------|---------------|--------------|--------------|--------------|
|                              |                                               | Nitrofurantoin                 | Ciprofloxacin | Norfloxacin  | TMP/SMX      | Other‡       |
| <b>Relatively Low eGFR*</b>  |                                               |                                |               |              |              |              |
| Nitrofurantoin               | 5 551                                         |                                | 222 (40.3)    | 86 (15.6)    | 102 (18.5)   | 141 (25.6)   |
| Ciprofloxacin                | 137                                           | 59 (43.1)                      |               | §            | 22 (16.1)    | 56 (40.9)    |
| Norfloxacin                  | 145                                           | 45 (31.0)                      | 29 (20.0)     |              | 33 (22.8)    | 38 (26.2)    |
| TMP/SMX                      | 193                                           | 57 (29.5)                      | 59 (30.6)     | 34 (17.6)    |              | 43 (22.3)    |
| <b>Relatively High eGFR†</b> |                                               |                                |               |              |              |              |
| Nitrofurantoin               | 8 198                                         |                                | 2 966 (36.2)  | 1 678 (20.5) | 1 643 (20.0) | 1 911 (23.3) |
| Ciprofloxacin                | 1 825                                         | 869 (47.6)                     |               | 108 (5.9)    | 283 (15.5)   | 565 (31.0)   |
| Norfloxacin                  | 2 904                                         | 1 222 (42.1)                   | 426 (14.7)    |              | 518 (17.8)   | 738 (25.4)   |
| TMP/SMX                      | 3 957                                         | 1 486 (37.6)                   | 975 (24.6)    | 757 (19.1)   |              | 739 (18.7)   |

Data are presented as the number (percentage) of patients. eGFR = estimated glomerular filtration rate, TMP/SMX= trimethoprim-sulfamethoxazole

\*Relatively low eGFR cohort: the algorithm of database codes identified patients with a median eGFR of 38 mL/min per 1.73m<sup>2</sup>.<sup>1</sup>

†Relatively high eGFR cohort: absence of chronic kidney disease database codes identified patients with a median eGFR of 69 mL/min per 1.73m<sup>2</sup>.<sup>1</sup>

‡'Other' antibiotics listed in Appendix 2.

§Cell combined with Other column due to privacy reasons.

Reference

1. Fleet JL, Dixon SN, Shariff SZ, et al. Detecting chronic kidney disease in population-based administrative databases using an algorithm of hospital encounter and physician claim codes. *BMC Nephrol* 2013;14:81. doi:10.1186/1471-2369-14-81.
